# Supplementary material for: Novel Role of CETP in Macrophages: Reduction of Mitochondrial Oxidants Production and Modulation of Cell Immune-Metabolic Profile
Source: MDPI journal article supplement (doi:10.3390/antiox11091734), 2022-08-31
Supplement: s1 [file s1]

Supplementary Material

# Novel Role of CETP in Macrophages: Reduction of Mitochondrial Oxidants Production and Modulation of Cell Immune-Metabolic Profile

Gabriel G. Dorighello, Leandro H. P. Assis, Thiago Rentz, Joseane Morari, Monique F. M. Santana, Marisa Passarelli, Neale D. Ridgway, Anibal E. Vercesi and Helena C. F. Oliveira

**A:** CETP genotyping: tail tip genomic DNA

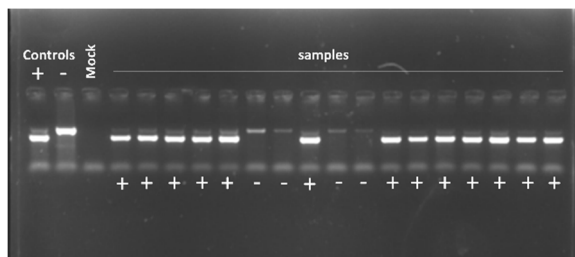

**B:** CETP mRNA

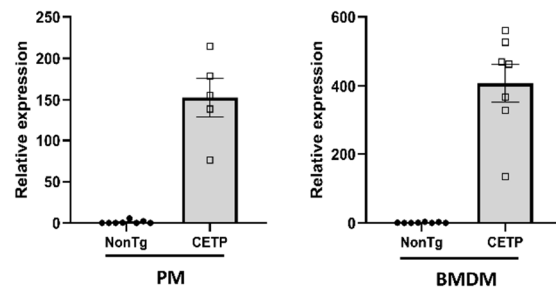

**Supplementary Figure S1:** CETP genotyping (A) by PCR of genomic DNA and mRNA expression (B) in peritoneal macrophage (PM) and bone marrow derived macrophage (BMDM).

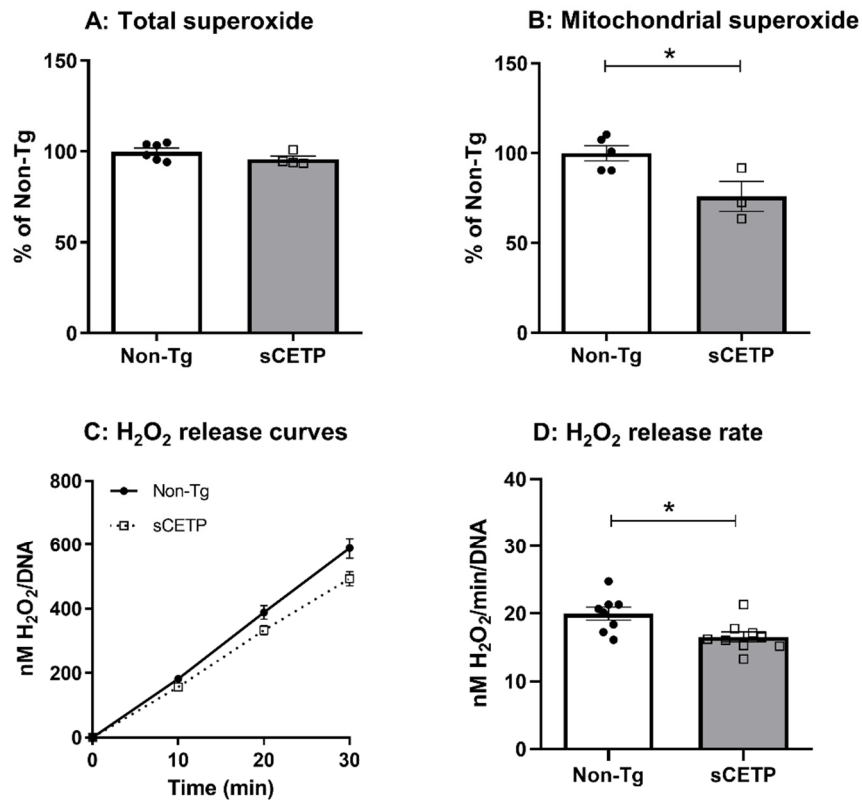

**Supplementary Figure S2:** Oxidant production in thioglycolate-elicited peritoneal macrophages from simian CETP transgenic mice and non-transgenic mice (Non-Tg). Total cell superoxide quantified with DHE (A), mitochondrial superoxide quantified with Mitosox® (B), total hydrogen peroxide release rates (C-D) quantified with Amplex® red and HRP. A: n=4-6 for cell superoxide; B: n=3-5 for mitochondrial superoxide; C-D: n=8-9 for H<sub>2</sub>O<sub>2</sub> release; \*p<0.05 vs. Non-Tg.

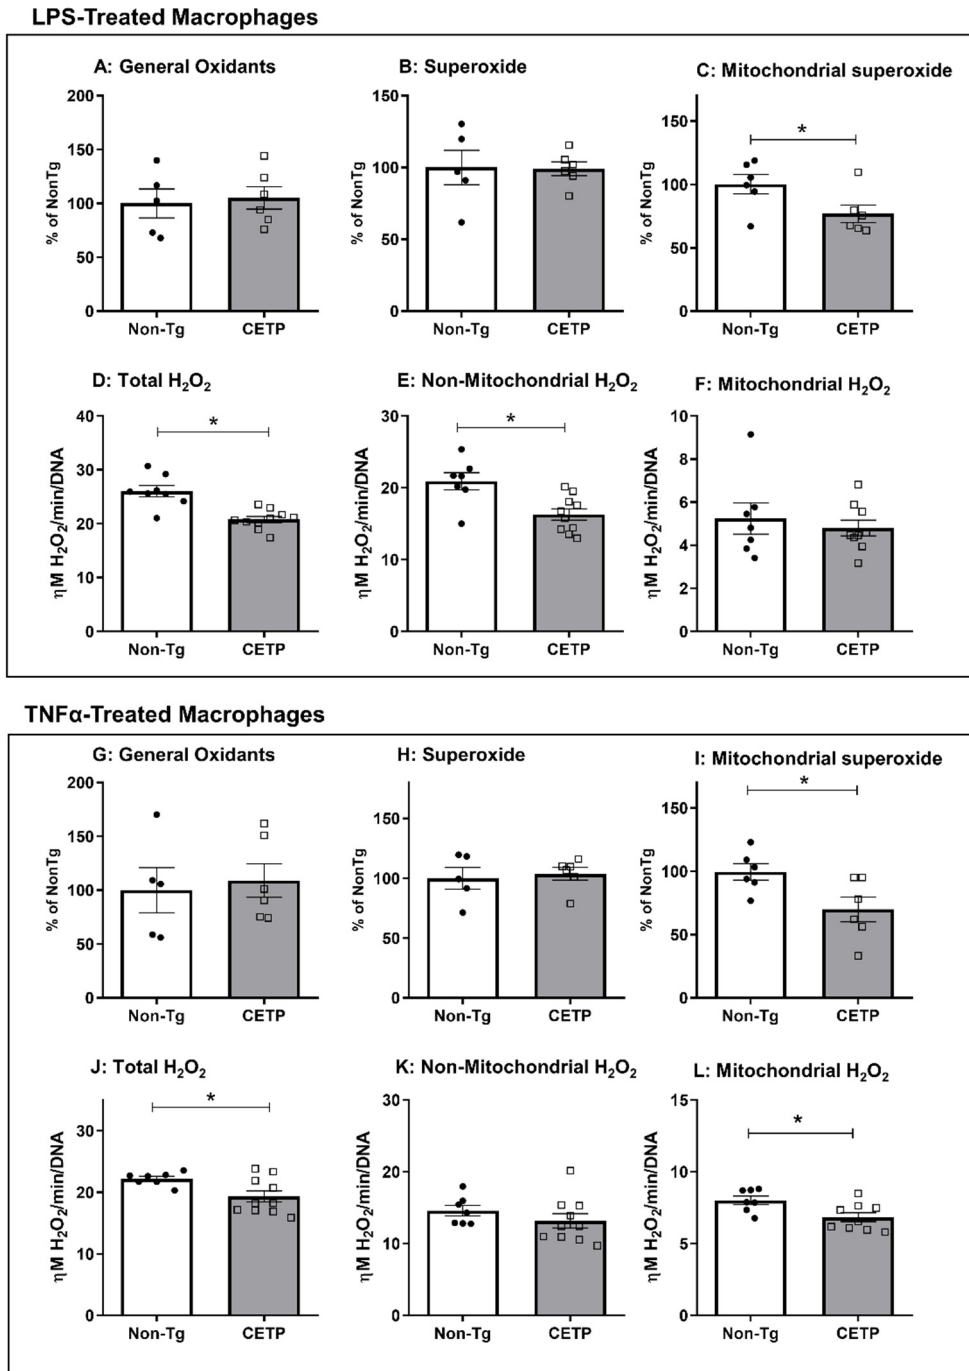

**Supplementary Figure S3:** Oxidant generation in thioglycolate-elicited peritoneal macrophages from human CETP transgenic mice and non-transgenic mice (Non-Tg) after activation with LPS (100 nM) (**A-F**) or TNF $\alpha$  (5 U/mL) (**G-L**). General oxidants quantified with H<sub>2</sub>DCFDA (**A, G**), total cell superoxide quantified with DHE (**B, H**), mitochondrial superoxide quantified with Mitosox<sup>®</sup> (**C, I**), total H<sub>2</sub>O<sub>2</sub> (**D, J**), non-mitochondrial H<sub>2</sub>O<sub>2</sub> (**E, K**) and mitochondrial H<sub>2</sub>O<sub>2</sub> (**F, L**) with Amplex<sup>®</sup> red and HRP. Non-mitochondria H<sub>2</sub>O<sub>2</sub> contribution was determined in cells treated with FCCP (1  $\mu$ M) and mitochondrial derived H<sub>2</sub>O<sub>2</sub> was calculated as [total - non-mitochondrial H<sub>2</sub>O<sub>2</sub>]. N=5-6 for global oxidants and superoxide; n=7-10 for H<sub>2</sub>O<sub>2</sub> release; \*p<0.05 vs. Non-Tg.

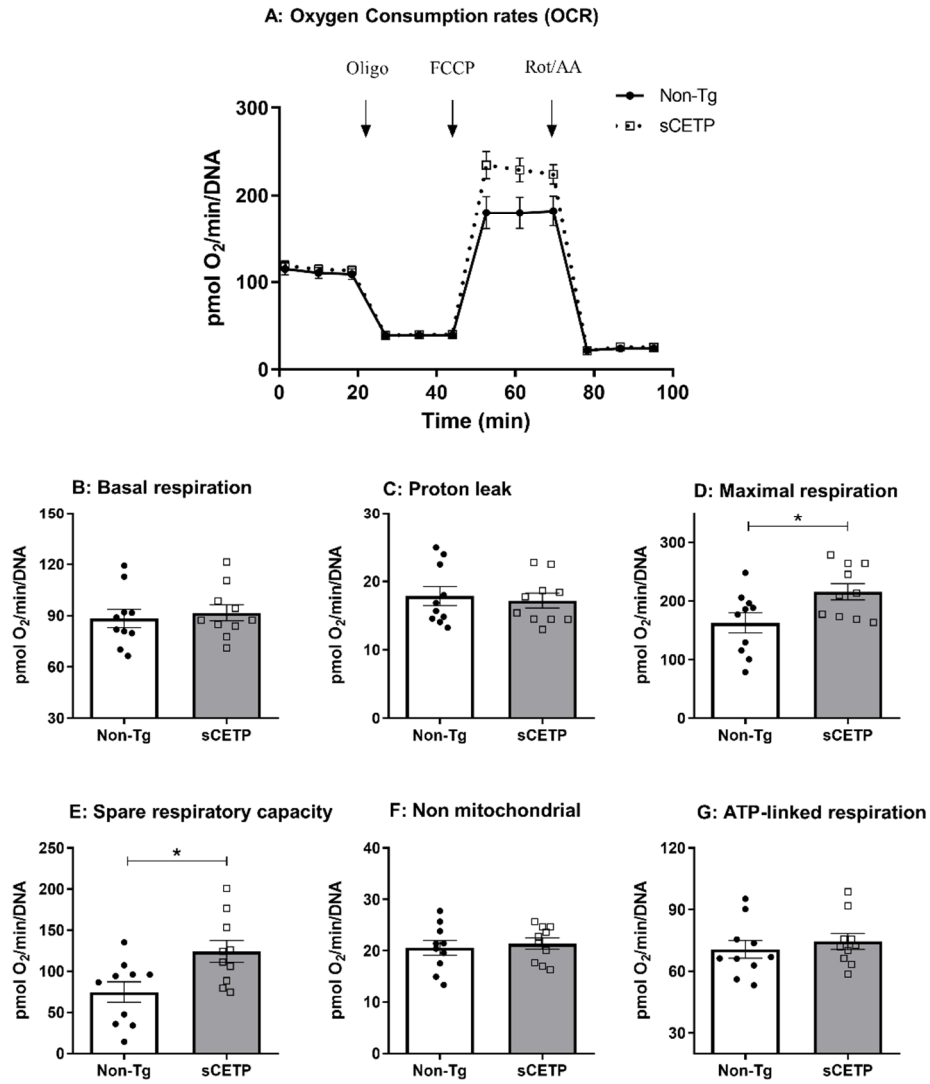

**Supplementary Figure S4:** Oxygen consumption rates (OCR) in thioglycolate-elicited peritoneal macrophages from simian CETP (sCETP) transgenic and non-transgenic mice (Non-Tg). The OCR were evaluated using a Seahorse® - XF24 Extracellular Flux Analyzer (Agilent, USA). **A:** Average curves of OCR with sequential additions of oligomycin (1  $\mu$ M), FCCP (1  $\mu$ M), and rotenone/antimycin A (1  $\mu$ M); **B:** Basal respiration; **C:** Proton leak; **D:** Maximal respiration; **E:** Spare respiratory capacity; **F:** Non-mitochondrial respiration; **G:** ATP linked respiration; n= 10; \*p<0.05 vs. Non-Tg.

**Supplementary Table S1.** Oligonucleotides used to assess gene expression.

| Gene                  | Oligonucleotides sequences |                                |
|-----------------------|----------------------------|--------------------------------|
| ACTB                  | forward                    | 5'-AGAAGCTGTGCTATGTTGCTCTA-3'  |
|                       | reverse                    | 5'-TCAGGCAGCTCATAGCTCTTC-3'    |
| hCETP                 | forward                    | 5'-GGCCAAGTCAAGTATGGGTTG-3'    |
|                       | reverse                    | 5'-ACAGACACGTTCTGAATGGAGA-3'   |
| ARG1                  | forward                    | 5'-CTCCAAGCCAAAGTCCTTAGAG-3'   |
|                       | reverse                    | 5'-AGGAGCTGTCATTAGGGACATC-3'   |
| CD36                  | forward                    | 5'-GGAAGTGTGGGCTCATTGC-3'      |
|                       | reverse                    | 5'-CATGAGAATGCCTCCAAACAC-3'    |
| IL-10                 | forward                    | 5'-GCTCTTACTGACTGGCATGAG-3'    |
|                       | reverse                    | 5'-CGCAGCTCTAGGAGCATGTG-3'     |
| IL-1 $\beta$          | forward                    | 5'-CCTTCCAGGATGAGGACATGA-3'    |
|                       | reverse                    | 5'-TGAGTCACAGAGGATGGGCTC-3'    |
| IL-4                  | forward                    | 5'-CCAAACGTCCTCACAGCAAC-3'     |
|                       | reverse                    | 5'-AAGCCCGAAAGAGTCTCTGC-3'     |
| IL-6                  | forward                    | 5'-CACGGCCTTCCCTACTTCAC-3'     |
|                       | reverse                    | 5'-GGTCTGTTGGGAGTGGTATC-3'     |
| iNOS                  | forward                    | 5'-GTTCTCAGCCCAACAATAACAAGA-3' |
|                       | reverse                    | 5'-GTGGACGGGTCGATGTCAC-3'      |
| MFN-2                 | forward                    | 5'-TGCACCGCCATATAGAGGAAG-3'    |
|                       | reverse                    | 5'-TCTGCAGTGAAGTGGCAATG-3'     |
| TNF- $\alpha$         | forward                    | 5'-CCCTCCTGGCCAACGGCATG-3'     |
|                       | reverse                    | 5'-TCGGGGCAGCCTTGTCCCTT-3'     |
| MFN1                  | forward                    | 5'-GCAGACAGCACATGGAGAGA-3'     |
|                       | reverse                    | 5'-GATCCGATTCCGAGCTTCCG-3'     |
| OPA1                  | forward                    | 5'-ACCTTGCCAGTTTAGCTCCC-3'     |
|                       | reverse                    | 5'-TTGGGACCTGCAGTGAAGAA-3'     |
| DRP1                  | forward                    | 5'-ATGCCAGCAAGTCCACAGAA-3'     |
|                       | reverse                    | 5'-TGTTCTCGGGCAGACAGTTT-3'     |
| FIS1                  | forward                    | 5'-CAAAGAGGAACAGCGGGACT-3'     |
|                       | reverse                    | 5'-ACAGCCCTCGCACATACTTT-3'     |
| SREBP1                | forward                    | 5'-GATGTGCGAACTGGACACAG-3'     |
|                       | reverse                    | 5'-CATAGGGGGCGTCAAACAG-3'      |
| SRBP2                 | forward                    | 5'-GCAGCAACGGGACCATTCT-3'      |
|                       | reverse                    | 5'-CCCCATGACTAAGTCCTTCAACT-3'  |
| LDLR                  | forward                    | 5'-TGACTCAGACGAACAAGGCTG-3'    |
|                       | reverse                    | 5'-ATCTAGGCAATCTCGGTCTCC-3'    |
| HMGCR                 | forward                    | 5'-TGTTACCGGCAACAACAAGA-3'     |
|                       | reverse                    | 5'-CCGCGTTATCGTCAGGATGA-3'     |
| SRA                   | forward                    | 5'-TCAGACTGAAGGACTGGGAACA-3'   |
|                       | reverse                    | 5'-GGAGGCCCTTGAATGAAGGT-3'     |
| SRB1                  | forward                    | 5'-TGTAAGTGCCTAACATCTTGGTCC-3' |
|                       | reverse                    | 5'-ACTGTGCGGTTCAAAAAGCA-3'     |
| ABCG1                 | forward                    | 5'-TCACCCAGTTCTGCATCCTCT-3'    |
|                       | reverse                    | 5'-GCAGATGTGTCAGGACCGAGT-3'    |
| ABCA1                 | forward                    | 5'-CGTTTCCGGGAAGTGTCTTA-3'     |
|                       | reverse                    | 5'-GCTAGAGATGACAAGGAGGATGGA-3' |
| hCETP-THP-1           | forward                    | 5'-TCAGTCCATTGACTTCGAGATCG-3'  |
|                       | reverse                    | 5'-GCATCGGTCCGCACTCTAC-3'      |
| hTNF- $\alpha$ -THP-1 | forward                    | 5'-TCAGCAAGGACAGCAGAGG-3'      |
|                       | reverse                    | 5'-CAGTATGTGAGAGGAAGAGAACC-3'  |
| hMFN-2-THP-1          | forward                    | 5'-CACATGGAGCGTTGTACCAG-3'     |

| Gene         | Oligonucleotides sequences |                               |
|--------------|----------------------------|-------------------------------|
| hCD36-THP-1  | reverse                    | 5'-TTGAGCACCTCCTTAGCAGAC-3'   |
|              | forward                    | 5'-GGCTGTGACCGGAACTGTG-3'     |
|              | reverse                    | 5'-AGGTCTCCAAGTGGCATTAGAA-3'  |
| hGAPDH-THP-1 | forward                    | 5'-CTGGGCTACACTGAGCACC-3'     |
|              | reverse                    | 5'-AAGTGGTCGTTGAGGGCAATG-3'   |
| hPGK1-THP-1  | forward                    | 5'-GACCTAATGTCCAAAGCTGAGAA-3' |
|              | reverse                    | 5'-CAGCAGGTATGCCAGAAGCC-3'    |
